# Supplementary material for: Spatial analysis of the effect of the 2010 heat wave on stroke mortality in Nanjing, China
Source: PubMed Central journal article supplement (PMC4451699; doi:10.1038/srep10816), 2015-06-02
Supplement: srep10816-s1.pdf [file srep10816-s1.pdf]

1

## **Supplementary Information**

2

**Spatial analysis of the effect of the 2010 heat wave on stroke mortality in**

3

**Nanjing, China**

4

Kai Chen, Lei Huang, Lian Zhou, Zongwei Ma, Jun Bi and Tiantian Li

5

| 6  | <b><u>Table of Contents</u></b>                                                                 | <b><u>Page</u></b> |
|----|-------------------------------------------------------------------------------------------------|--------------------|
| 7  | <b>Tables</b>                                                                                   |                    |
| 8  | <b>Supplementary Table S1.</b> Risk ratios of heat wave on stroke mortality in different        |                    |
| 9  | districts of Nanjing City.                                                                      | 4                  |
| 10 | <b>Supplementary Table S2.</b> Risk ratios (95% CI) of heat wave on stroke mortality in         |                    |
| 11 | Nanjing using different reference periods.                                                      | 5                  |
| 12 | <b>Supplementary Table S3.</b> Significance of differences (p-values) in characteristics of     |                    |
| 13 | stroke mortality cases between heat wave period (A1) and the reference period (A2 and A3)       |                    |
| 14 | using the Wilcoxon–Mann–Whitney test.                                                           | 6                  |
| 15 | <b>Supplementary Table S4.</b> Summary of average daily maximum temperature (°C) and            |                    |
| 16 | number of stroke mortality cases by urbanity in heat wave period (A1) and reference period      |                    |
| 17 | (A2 and A3).                                                                                    | 7                  |
| 18 | <b>Figures</b>                                                                                  |                    |
| 19 | <b>Supplementary Figure S1.</b> Daily maximum temperature during the 2010 heat wave (A1)        |                    |
| 20 | and the reference period (A2 and A3).                                                           | 8                  |
| 21 | <b>Supplementary Figure S2.</b> Spatial distribution of Adjusted Odds Ratios (AOR) for total    |                    |
| 22 | stroke mortality (I60-I64) using different reference periods. (a) Using A2 stroke as reference; |                    |
| 23 | (b) Using A3 stroke as reference. The contour lines show the areas with significantly           |                    |
| 24 | increased or decreased AOR (p-value < 0.05). Maps were generated using R software (version      |                    |
| 25 | 2.15.0; R Foundation for Statistical Computing, Vienna, Austria).                               | 9                  |

26 **Supplementary Figure S3.** Relative risks of heat wave on stroke mortality in different  
27 districts of Nanjing. This map was generated using ArcGIS (version 10.0; ESRI, Redlands,  
28 CA). 10

29 **Supplementary Figure S4.** Scatter plot of heat wave risks and vulnerability factors in  
30 different districts of Nanjing. RRs stands for relative risks, pdincome is the per capita  
31 disposable income (RMB), pelder is the percent of people  $\geq 65$  years of age, AC is the  
32 number of air conditioning units per 100 households in 2010, and pHbed is the hospital beds  
33 per 1000 people. Linear regression lines are also plotted. 11

34 **Supplementary Figure S5.** Spatial distribution of Adjusted Odds Ratios (AOR) for total  
35 stroke mortality (I60-I64) using different modeling choices. (a) Using the default  
36 convergence criteria and controlling gender, marriage, and occupation; (b) Using a more  
37 stringently convergence criteria and controlling gender, marriage, and occupation; (c) Using  
38 the default convergence criteria and controlling individual age, gender, marriage, and  
39 occupation; (d) Using a more stringently convergence criteria and controlling individual age,  
40 gender, marriage, and occupation. The contour lines show the areas with significantly  
41 increased or decreased AOR (p-value  $< 0.05$ ). Maps were generated using R software  
42 (version 2.15.0; R Foundation for Statistical Computing, Vienna, Austria). 12

43

44 **Supplementary Table S1.** Risk ratios (95% CI) of heat wave on stroke mortality in different  
 45 districts of Nanjing City.

46

| <b>Districts</b>          | <b>Heat wave cases</b> | <b>Reference period cases<sup>a</sup></b> | <b>RR</b>              |
|---------------------------|------------------------|-------------------------------------------|------------------------|
| <b>Luhe</b>               | 121                    | 49.5                                      | <b>2.44(2.03,2.92)</b> |
| <b>Xuanwu</b>             | 5                      | 13                                        | <b>0.38(0.12,0.90)</b> |
| <b>Baixia</b>             | 22                     | 19                                        | 1.16(0.73,1.75)        |
| <b>Qinhuai</b>            | 8                      | 15                                        | 0.53(0.23,1.05)        |
| <b>Jianye</b>             | 5                      | 9.5                                       | 0.53(0.17,1.23)        |
| <b>Gulou</b>              | 21                     | 19.5                                      | 1.08(0.67,1.65)        |
| <b>Xiaguan</b>            | 16                     | 13                                        | 1.23(0.70,2.00)        |
| <b>Yuhuatai</b>           | 19                     | 13                                        | 1.46(0.88,2.28)        |
| <b>Pukou</b>              | 34                     | 33                                        | 1.03(0.71,1.44)        |
| <b>Qixia</b>              | 21                     | 16.5                                      | 1.27(0.79,1.95)        |
| <b>Jiangning</b>          | 70                     | 56                                        | 1.25(0.97,1.58)        |
| <b>Lishui</b>             | 25                     | 29.5                                      | 0.85(0.55,1.25)        |
| <b>Gaochun</b>            | 51                     | 25.5                                      | <b>2.00(1.49,2.63)</b> |
| <b>Urban districts</b>    | 96                     | 102                                       | 0.94(0.76,1.15)        |
| <b>Suburban districts</b> | 125                    | 105.5                                     | 1.18(0.99,1.41)        |
| <b>Rural districts</b>    | 197                    | 104.5                                     | <b>1.89(1.63,2.17)</b> |
| <b>Whole Area</b>         | 418                    | 312                                       | <b>1.34(1.21,1.47)</b> |

47 <sup>a</sup> Using average cases of A2 period (July 29-August 16, 2009) and A3 period (July 27-August  
 48 14, 2011).

49

50 **Supplementary Table S2.** Risk ratios (95% CI) of heat wave on stroke mortality in Nanjing  
51 using different reference periods <sup>a</sup>.

52

| Region             | RR <sup>b</sup>        | RR <sup>c</sup>        |
|--------------------|------------------------|------------------------|
| Urban districts    | 0.82(0.66,1.01)        | 1.10(0.89,1.35)        |
| Suburban districts | <b>1.29(1.07,1.54)</b> | 1.10(0.91,1.31)        |
| Rural districts    | <b>2.01(1.74,2.31)</b> | <b>1.77(1.54,2.04)</b> |
| Nanjing            | <b>1.34(1.21,1.47)</b> | <b>1.34(1.21,1.47)</b> |

53 <sup>a</sup> RR was calculated as the ratio between stroke deaths in the heat wave and in the reference  
54 period;

55 <sup>b</sup> Using A2 period (July 29-August 16, 2009) alone as the reference period;

56 <sup>c</sup> Using A3 period (July 27-August 14, 2011) alone as the reference period.

57

58

59 **Supplementary Table S3.** Significance of differences (p-values) in characteristics of stroke  
60 mortality cases between heat wave period (A1) and the reference period (A2 and A3) using  
61 the Wilcoxon–Mann–Whitney test.

62

| Characteristics | A1 vs. A2    | A1 vs. A3    |
|-----------------|--------------|--------------|
| Age             | 0.299        | 0.785        |
| Gender          | 0.886        | <b>0.004</b> |
| Marital status  | <b>0.024</b> | 0.700        |
| Education       | 0.096        | 0.076        |
| Occupation      | <b>0.002</b> | 0.086        |
| Death location  | 0.235        | 0.400        |

63

64

65 **Supplementary Table S4.** Summary of average daily maximum temperature (°C) and  
66 number of stroke mortality cases by urbanity in heat wave period (A1) and reference period  
67 (A2 and A3).

68

| Characteristics          | A1, n (%)   | A2, n (%)   | A3, n (%)   |
|--------------------------|-------------|-------------|-------------|
| Maximum temperature (°C) | 36.12       | 29.52       | 33.32       |
| Number of cases          | 418(100.0%) | 312(100.0%) | 312(100.0%) |
| urban                    | 96(23.0%)   | 117(37.5%)  | 87(27.9%)   |
| suburban                 | 125(29.9%)  | 97(31.1%)   | 114(36.5%)  |
| rural                    | 197(47.1%)  | 98(31.4%)   | 111(35.6%)  |

69

70

71

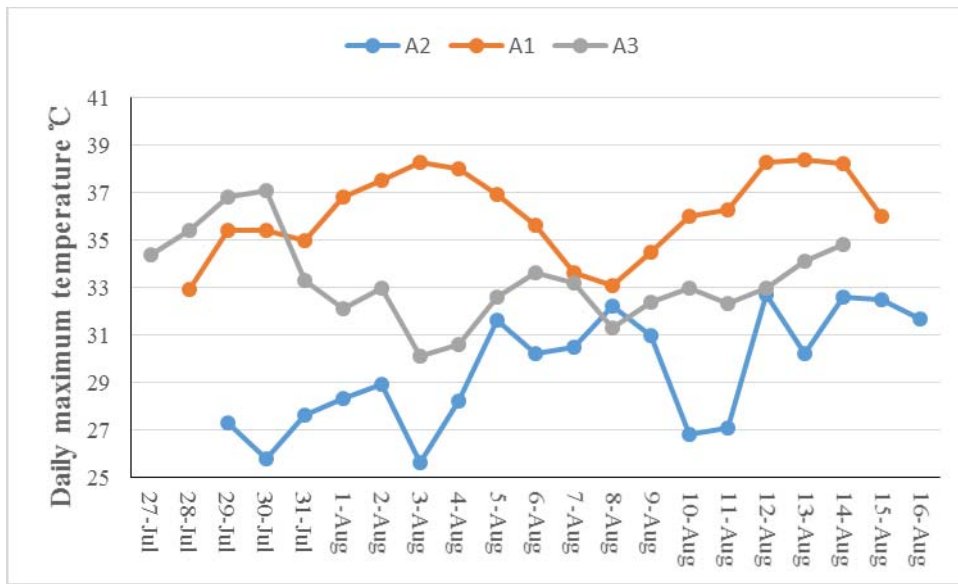

72

73 **Supplementary Figure S1.** Daily maximum temperature during the 2010 heat wave (A1) and  
74 two reference periods (A2 and A3).

75



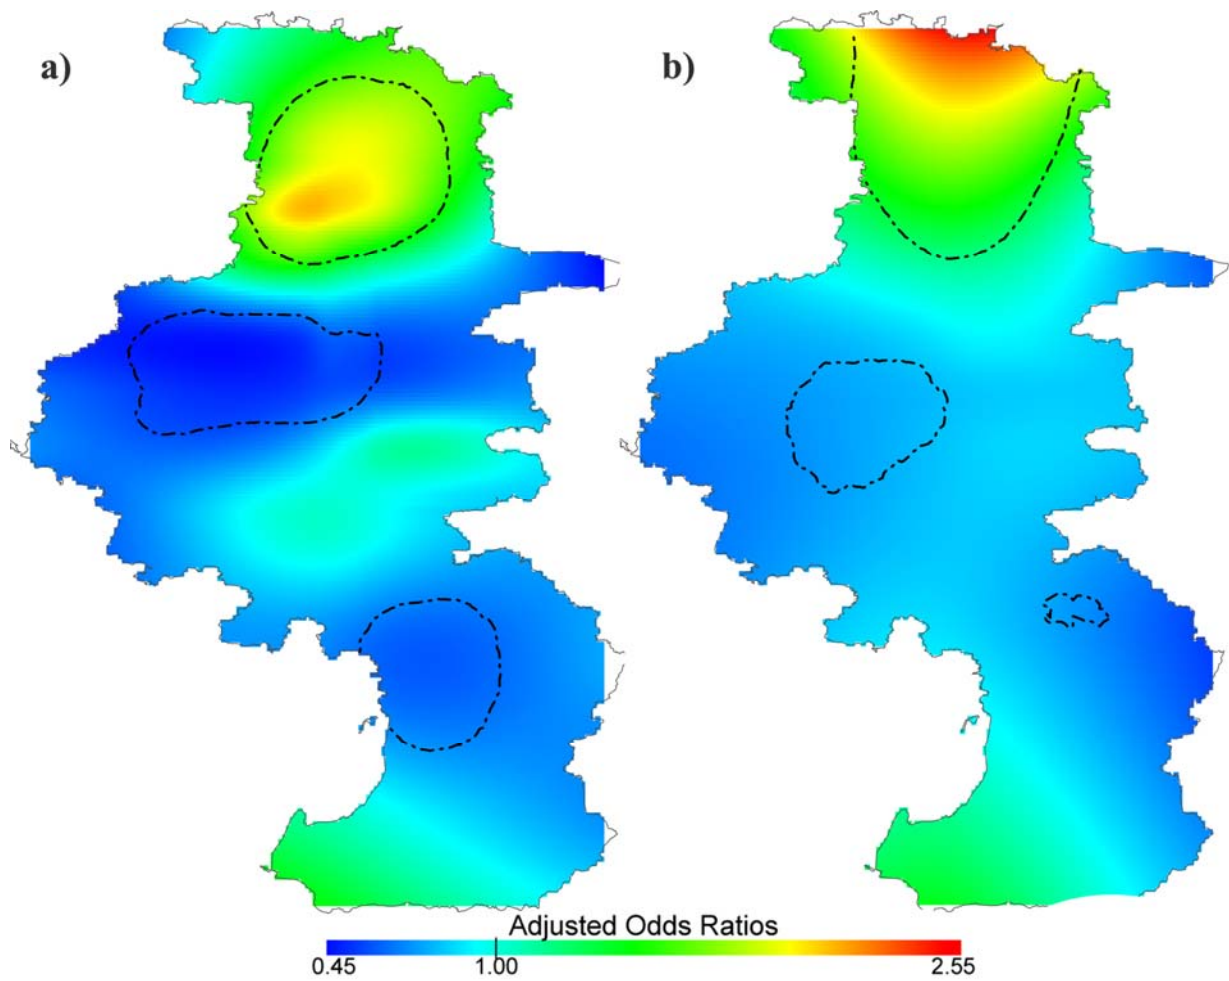

77

78 **Supplementary Figure S2.** Spatial distribution of Adjusted Odds Ratios (AOR) for total  
79 stroke mortality (I60-I64) using different reference periods. (a) Using A2 stroke as reference;  
80 (b) Using A3 stroke as reference. The contour lines show the areas with significantly  
81 increased or decreased AOR (p-value < 0.05). Maps were generated using R software (version  
82 2.15.0; R Foundation for Statistical Computing, Vienna, Austria).

83

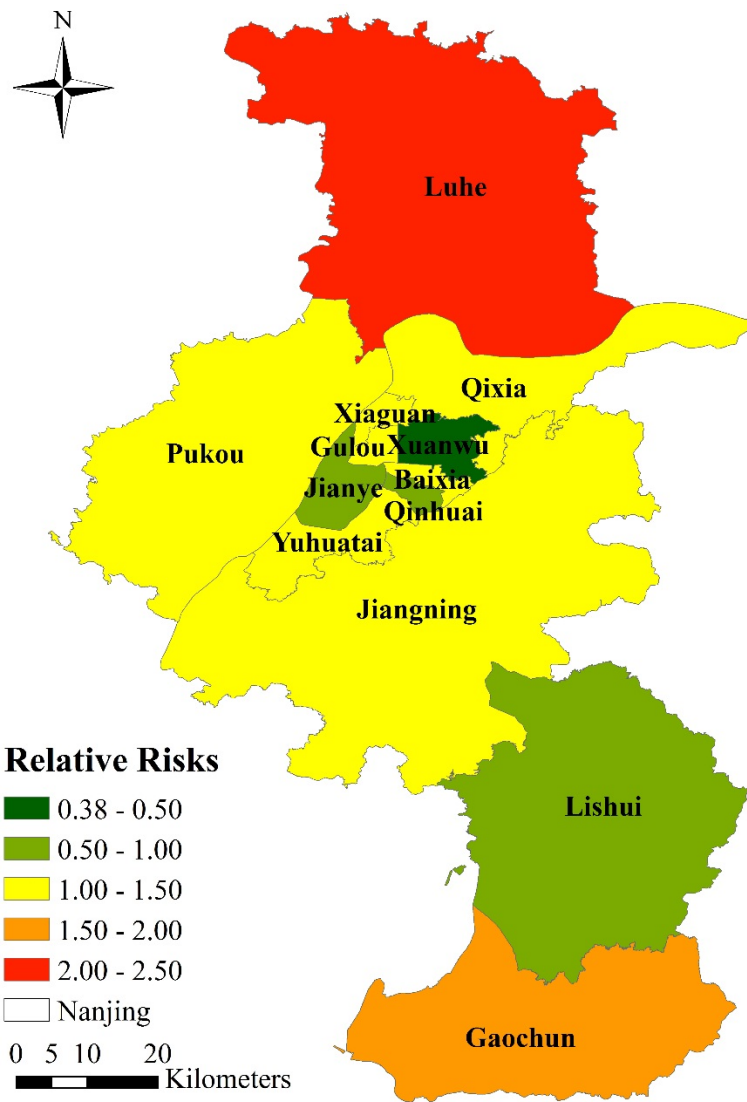

85

86 **Supplementary Figure S3.** Relative risks of heat wave on stroke mortality in different  
87 districts of Nanjing City. This map was generated using ArcGIS (version 10.0; ESRI, Redlands,  
88 CA).

89

90

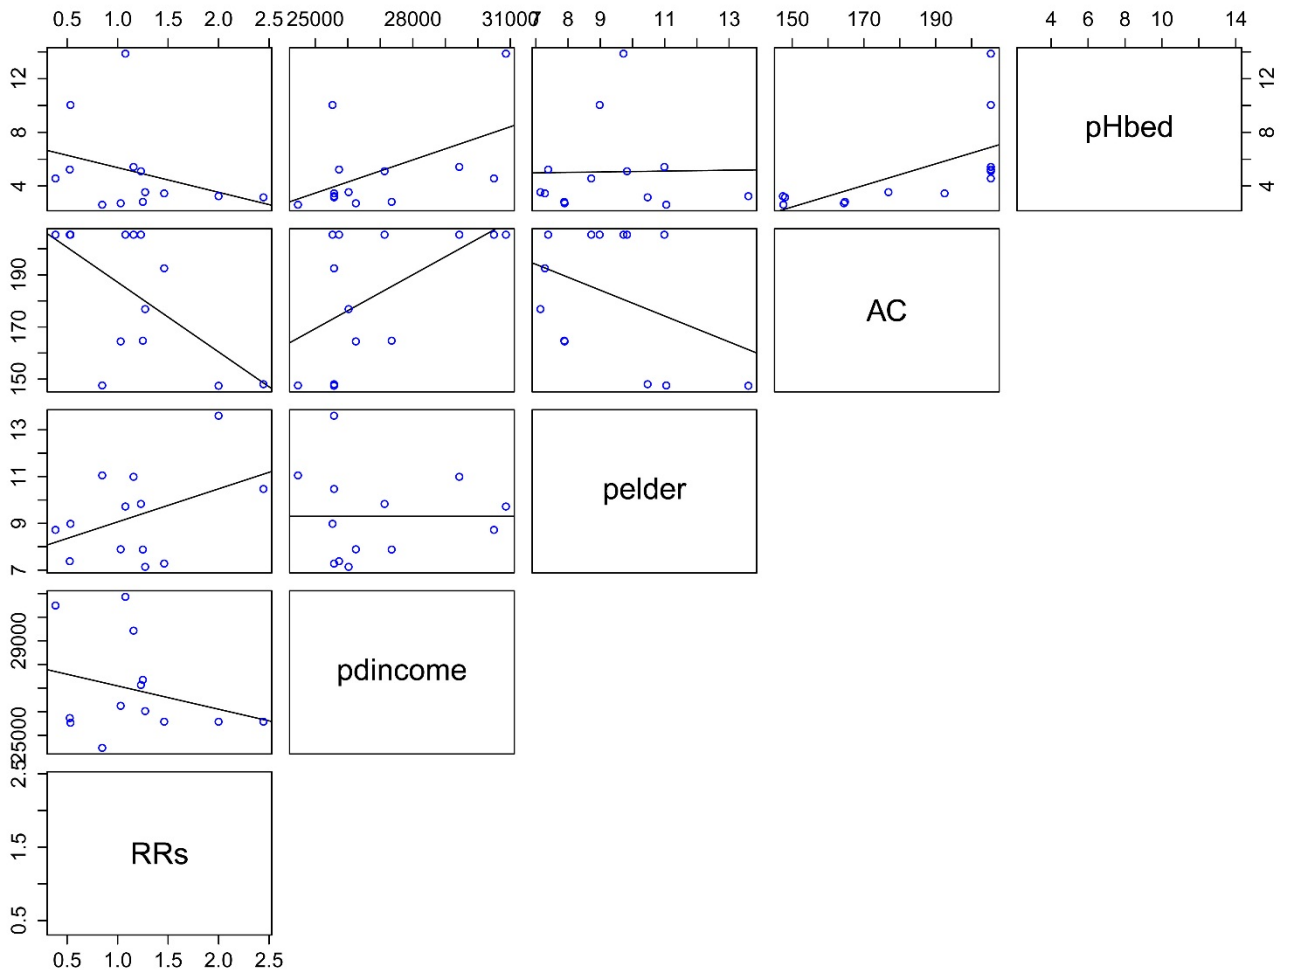

91

92 **Supplementary Figure S4.** Scatter plot of heat wave risks and vulnerability factors in  
93 different districts of Nanjing. RRs stands for relative risks, pdincome is the per capita  
94 disposable income (RMB), pelder is the percent of people  $\geq 65$  years of age, AC is the  
95 number of air-conditioners per 100 households in 2010, and pHbed is the hospital beds per  
96 1000 people. Linear regression lines are also plotted.

97

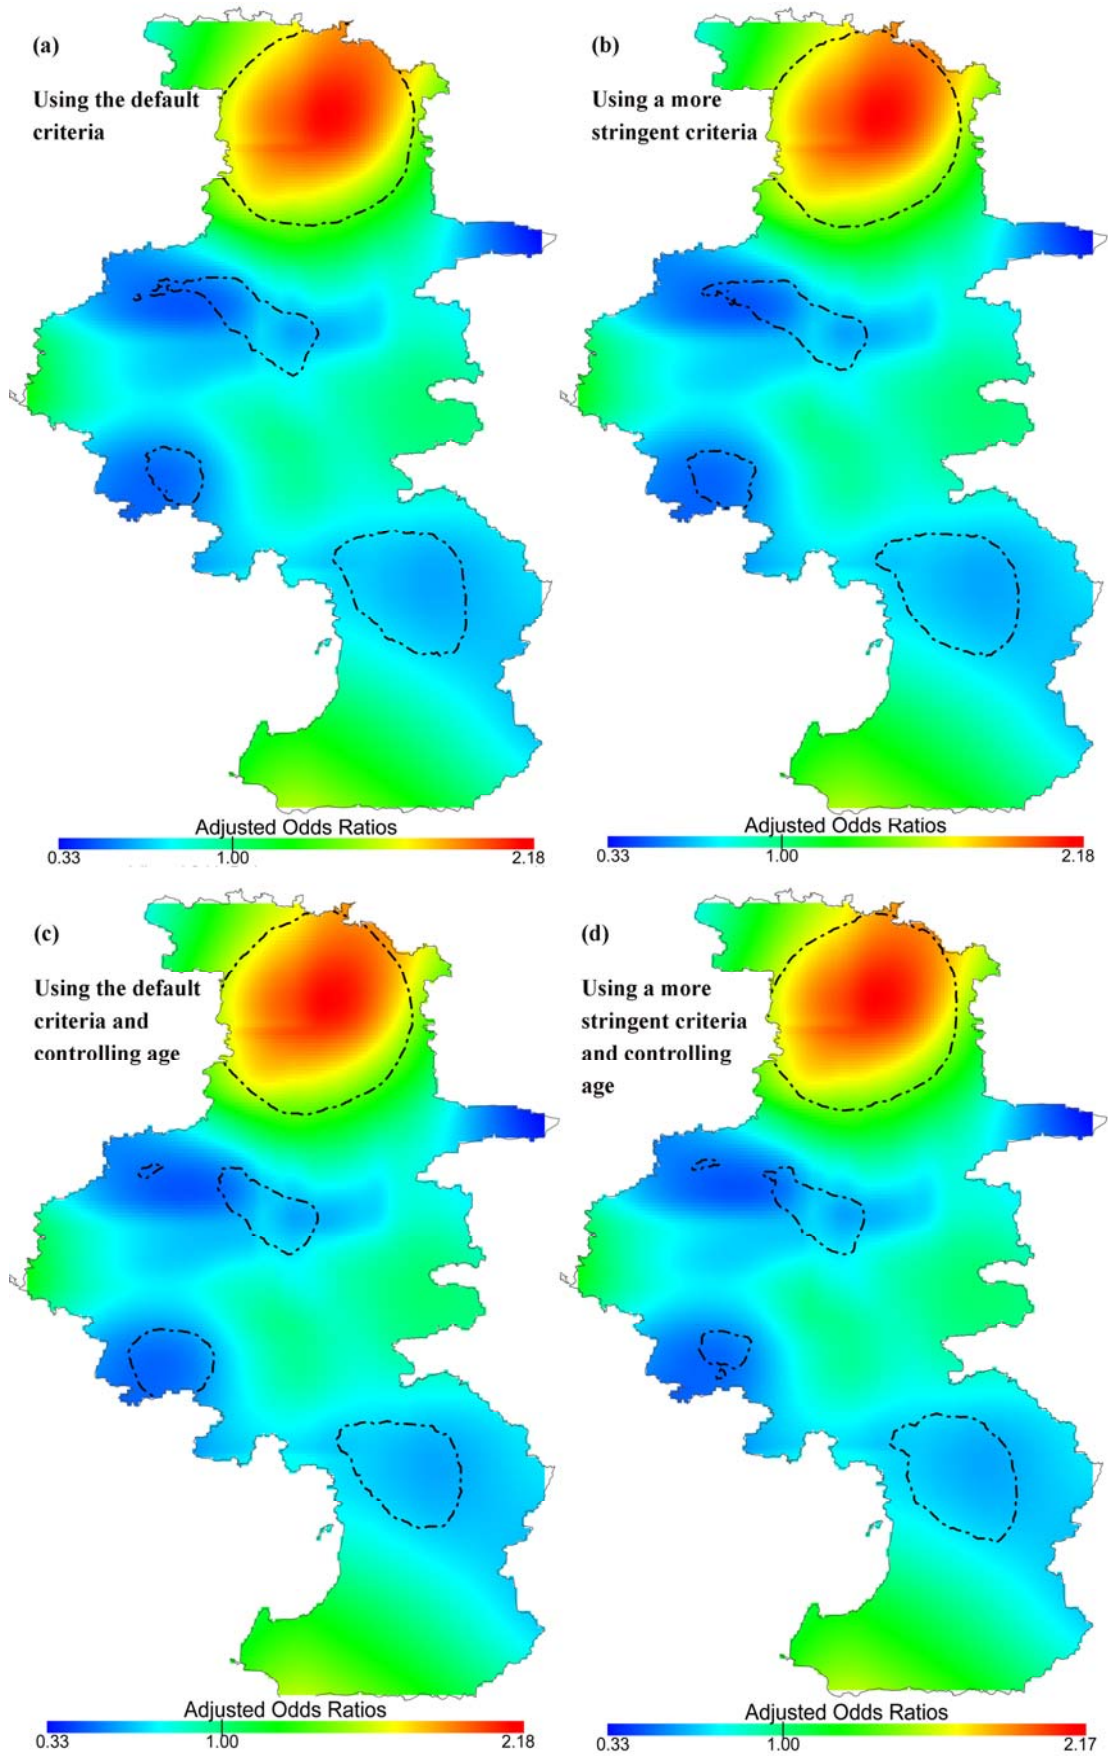

99 **Supplementary Figure S5.** Spatial distribution of Adjusted Odds Ratios (AOR) for total  
100 stroke mortality (I60-I64) using different modeling choices. (a) Using the default  
101 convergence criteria and controlling gender, marriage, and occupation; (b) Using a more  
102 stringently convergence criteria and controlling gender, marriage, and occupation; (c) Using  
103 the default convergence criteria and controlling individual age, gender, marriage, and  
104 occupation; (d) Using a more stringently convergence criteria and controlling individual age,  
105 gender, marriage, and occupation. The contour lines show the areas with significantly  
106 increased or decreased AOR (p-value < 0.05). Maps were generated using R software (version  
107 2.15.0; R Foundation for Statistical Computing, Vienna, Austria).

108
